# Supplementary material for: PD-1T TILs as a Predictive Biomarker for Clinical Benefit to PD-1 Blockade in Patients with Advanced NSCLC
Source: PubMed Central journal article supplement — Clin Cancer Res. 2022 Jul 19;28(22):4893–906. doi: 10.1158/1078-0432.CCR-22-0992 (PMC9762332; doi:10.1158/1078-0432.ccr-22-0992), 2022-07-19
Supplement: ccr-22-0992_supplementary_tables_s1-s9_suppts9.pdf [file ccr-22-0992_supplementary_tables_s1-s9_suppts9.pdf]

**Table S1.** Exclusion criteria for PD-1<sup>T</sup> TILs assessment

|                                                 |
|-------------------------------------------------|
| <b>List of Exclusion criteria:</b>              |
| - Samples containing <10,000 cells              |
| - Samples obtained >2 years before start of ICB |
| - Samples from the bronchus site                |
| - Samples containing normal lymphoid tissue     |

**Table S2.** Overview of all analyzed biomarkers per patient.

| Sample ID   | 1 = DCR 6 months, 0= PD | 1 = DCR 12 months, 0= PD | T= Training, V= validation | PD1 <sup>T</sup> TILs per mm <sup>2</sup> tumor area | PD-L1 TPS | TLS per mm <sup>2</sup> | TLS+LA per mm <sup>2</sup> | CD20-positive area per mm <sup>2</sup> |
|-------------|-------------------------|--------------------------|----------------------------|------------------------------------------------------|-----------|-------------------------|----------------------------|----------------------------------------|
| NKI-AvL 001 | 1                       | 1                        | T                          | 265                                                  | 1         | 0.00                    | 0.14                       | 0.22                                   |
| NKI-AvL 002 | 0                       | 0                        | T                          | 25                                                   | 40        | 0.00                    | 0.35                       | 0.57                                   |
| NKI-AvL 003 | 0                       | 0                        | T                          | 80                                                   | 0         | 0.19                    | 0.50                       | 2.62                                   |
| NKI-AvL 004 | 0                       | 0                        | T                          | 67                                                   | 90        | 0.00                    | 0.00                       | 0.10                                   |
| NKI-AvL 005 | 1                       | 1                        | T                          | 298                                                  | 0         | 0.00                    | 0.55                       | 0.34                                   |
| NKI-AvL 006 | 0                       | 0                        | T                          | 6                                                    | 0         | 0.00                    | 0.00                       | 0.36                                   |
| NKI-AvL 007 | 0                       | 0                        | T                          | 204                                                  | 0         | 0.00                    | 0.24                       | 0.38                                   |
| NKI-AvL 008 | 1                       | 1                        | T                          | 367                                                  | 80        | 0.28                    | 0.44                       | 1.08                                   |
| NKI-AvL 009 | 0                       | 0                        | T                          | 43                                                   | 0         | 0.01                    | 0.04                       | 0.17                                   |
| NKI-AvL 010 | 0                       | 0                        | T                          | 21                                                   | 0         | 0.00                    | 0.00                       | 0.01                                   |
| NKI-AvL 011 | 0                       | 0                        | T                          | 31                                                   | 30        | 0.00                    | 0.01                       | 0.08                                   |
| NKI-AvL 012 | 0                       | 0                        | T                          | 150                                                  | 1         | 0.00                    | 0.22                       | 0.34                                   |
| NKI-AvL 013 | 0                       | 0                        | T                          | 18                                                   | 0         | 0.00                    | 0.02                       | 0.21                                   |
| NKI-AvL 014 | 0                       | 0                        | T                          | 230                                                  | 100       | 0.08                    | 0.24                       | 1.45                                   |
| NKI-AvL 015 | 0                       | 0                        | T                          | 55                                                   | 0         | 0.00                    | 0.02                       | 0.15                                   |
| NKI-AvL 016 | 1                       | 1                        | T                          | 181                                                  | 1         | 0.05                    | 0.16                       | 0.51                                   |
| NKI-AvL 017 | 0                       | 0                        | T                          | 126                                                  | 0         | 0.00                    | 0.00                       | 0.03                                   |
| NKI-AvL 018 | 1                       | 1                        | T                          | 226                                                  | 30        | 0.16                    | 0.47                       | 1.80                                   |
| NKI-AvL 019 | 0                       | 0                        | T                          | 244                                                  | 10        | 0.00                    | 0.00                       | 0.02                                   |
| NKI-AvL 020 | 1                       | 1                        | T                          | 319                                                  | 100       | 0.07                    | 0.31                       | 1.31                                   |
| NKI-AvL 021 | 1                       | 1                        | T                          | 352                                                  | 1         | 0.66                    | 1.33                       | 5.93                                   |
| NKI-AvL 022 | 0                       | 0                        | T                          | 51                                                   | 40        | 0.01                    | 0.07                       | 0.20                                   |
| NKI-AvL 023 | 0                       | 0                        | T                          | 80                                                   | 30        | 0.02                    | 0.06                       | 0.20                                   |
| NKI-AvL 024 | 0                       | 0                        | T                          | 31                                                   | 0         | NA                      | NA                         | NA                                     |
| NKI-AvL 025 | 1                       | 1                        | T                          | 104                                                  | 0         | NA                      | NA                         | NA                                     |
| NKI-AvL 026 | 1                       | 1                        | T                          | 1                                                    | 5         | 0                       | 0                          | 0.05                                   |
| NKI-AvL 027 | 0                       | 0                        | T                          | 27                                                   | 0         | 0                       | 0                          | 0.04                                   |
| NKI-AvL 028 | 0                       | 0                        | T                          | 44                                                   | 20        | NA                      | NA                         | NA                                     |
| NKI-AvL 029 | 1                       | 0                        | T                          | 31                                                   | 0         | 0                       | 0.13                       | 0.21                                   |
| NKI-AvL 030 | 0                       | 0                        | T                          | 29                                                   | 30        | 0                       | 0                          | 0.08                                   |
| NKI-AvL 031 | 0                       | 0                        | V                          | 152                                                  | 40        | 0.12                    | 0.12                       | 0.19                                   |
| NKI-AvL 032 | 0                       | 0                        | V                          | 67                                                   | 0         | 0.00                    | 0.48                       | 2.73                                   |
| NKI-AvL 033 | 1                       | 1                        | V                          | 537                                                  | 0         | 0.00                    | 0.00                       | 0.63                                   |
| NKI-AvL 034 | 1                       | 0                        | V                          | 24                                                   | 90        | 0.00                    | 0.00                       | 0.00                                   |
| NKI-AvL 035 | 0                       | 0                        | V                          | 70                                                   | 0         | 0.00                    | 0.00                       | 0.10                                   |
| NKI-AvL 036 | 1                       | 0                        | V                          | 828                                                  | 0         | 0.21                    | 0.43                       | 1.87                                   |
| NKI-AvL 037 | 0                       | 0                        | V                          | 434                                                  | 0         | 0.45                    | 0.63                       | 3.41                                   |
| NKI-AvL 038 | 0                       | 0                        | V                          | 83                                                   | 0         | 0.00                    | 0.00                       | 0.03                                   |
| NKI-AvL 039 | 1                       | 1                        | V                          | 115                                                  | 0         | 0.14                    | 0.28                       | 0.45                                   |
| NKI-AvL 040 | 0                       | 0                        | V                          | 34                                                   | 0         | 0.22                    | 0.77                       | 1.89                                   |
| NKI-AvL 041 | 1                       | 1                        | V                          | 130                                                  | 100       | 0.00                    | 0.00                       | 0.29                                   |
| NKI-AvL 042 | 0                       | 0                        | V                          | 98                                                   | 0         | 0.00                    | 0.00                       | 0.01                                   |
| NKI-AvL 043 | 0                       | 0                        | V                          | 44                                                   | 40        | 0.00                    | 0.00                       | 0.05                                   |
| NKI-AvL 044 | 0                       | 0                        | V                          | 68                                                   | 0         | 0.00                    | 0.00                       | 0.01                                   |
| NKI-AvL 045 | 1                       | 1                        | V                          | 210                                                  | 5         | 0.00                    | 0.00                       | 0.25                                   |
| NKI-AvL 046 | 0                       | 0                        | V                          | 1875                                                 | 0         | 0.89                    | 2.98                       | 11.07                                  |
| NKI-AvL 047 | 0                       | 0                        | V                          | 25                                                   | 1         | 0.00                    | 0.65                       | 0.79                                   |
| NKI-AvL 048 | 0                       | 0                        | V                          | 351                                                  | 40        | 0.00                    | 0.00                       | 0.07                                   |
| NKI-AvL 049 | 1                       | 1                        | V                          | 110                                                  | 40        | 0.00                    | 0.11                       | 0.33                                   |
| NKI-AvL 050 | 0                       | 0                        | V                          | 43                                                   | 1         | 0.00                    | 0.03                       | 0.17                                   |
| NKI-AvL 051 | 0                       | 0                        | V                          | 6                                                    | 0         | 0.00                    | 0.00                       | 0.02                                   |
| NKI-AvL 052 | 0                       | 0                        | V                          | 457                                                  | 0         | 0.00                    | 0.00                       | 0.51                                   |
| NKI-AvL 053 | 0                       | 0                        | V                          | 321                                                  | 1         | 0.00                    | 0.00                       | 0.06                                   |
| NKI-AvL 054 | 1                       | 1                        | V                          | 280                                                  | 95        | 0.03                    | 0.33                       | 1.40                                   |
| NKI-AvL 055 | 0                       | 0                        | V                          | 201                                                  | 10        | 0.00                    | 0.21                       | 0.78                                   |
| NKI-AvL 056 | 1                       | 1                        | V                          | 213                                                  | 0         | 0.03                    | 0.30                       | 1.08                                   |
| NKI-AvL 057 | 1                       | 1                        | V                          | 409                                                  | 0         | 0.48                    | 1.28                       | 2.03                                   |
| NKI-AvL 058 | 0                       | 0                        | V                          | 41                                                   | 0         | 0.11                    | 0.49                       | 0.97                                   |
| NKI-AvL 059 | 0                       | 0                        | V                          | 21                                                   | 0         | 0.05                    | 0.17                       | 0.66                                   |
| NKI-AvL 060 | 0                       | 0                        | V                          | 9                                                    | 10        | 0.00                    | 0.00                       | 0.05                                   |
| NKI-AvL 061 | 1                       | 0                        | V                          | 17                                                   | 0         | 0.00                    | 0.00                       | 0.76                                   |
| NKI-AvL 062 | 0                       | 0                        | V                          | 3                                                    | 1         | 0.00                    | 0.00                       | 0.01                                   |

|             |   |   |   |     |     |      |      |      |
|-------------|---|---|---|-----|-----|------|------|------|
| NKI-AvL 063 | 0 | 0 | V | 26  | 0   | 0.08 | 0.58 | 1.43 |
| NKI-AvL 064 | 0 | 0 | V | 17  | 60  | 0.00 | 0.00 | 0.19 |
| NKI-AvL 065 | 0 | 0 | V | 13  | 0   | 0.00 | 0.00 | 0.00 |
| NKI-AvL 066 | 0 | 0 | V | 128 | 0   | 0.00 | 0.00 | 0.02 |
| NKI-AvL 067 | 1 | 1 | V | 211 | 0   | 0.00 | 0.55 | 1.58 |
| NKI-AvL 068 | 0 | 0 | V | 85  | 0   | 0.00 | 0.00 | 0.06 |
| NKI-AvL 069 | 0 | 0 | V | 152 | 0   | 0.03 | 0.20 | 0.63 |
| NKI-AvL 070 | 0 | 0 | V | 13  | 0   | 0.00 | 0.00 | 0.04 |
| NKI-AvL 071 | 0 | 0 | V | 7   | 0   | 0.00 | 0.00 | 0.00 |
| NKI-AvL 072 | 0 | 0 | V | 236 | 0   | 0.14 | 0.60 | 2.00 |
| NKI-AvL 073 | 0 | 0 | V | 56  | 0   | 0.00 | 0.00 | 0.09 |
| NKI-AvL 074 | 0 | 0 | V | 15  | 0   | 0.00 | 0.00 | 0.04 |
| NKI-AvL 075 | 0 | 0 | V | 152 | 1   | 0.00 | 0.00 | 0.41 |
| NKI-AvL 076 | 0 | 0 | V | 206 | 80  | 0.00 | 0.00 | 0.03 |
| NKI-AvL 077 | 0 | 0 | V | 2   | 0   | 0.00 | 0.00 | 0.00 |
| NKI-AvL 078 | 0 | 0 | V | 6   | 0   | 0.00 | 0.00 | 0.03 |
| NKI-AvL 079 | 0 | 0 | V | 35  | 0   | 0.01 | 0.05 | 0.38 |
| NKI-AvL 080 | 0 | 0 | V | 22  | 10  | 0.00 | 0.00 | 0.08 |
| NKI-AvL 081 | 1 | 0 | V | 214 | 0   | 0.29 | 0.58 | 1.86 |
| NKI-AvL 082 | 0 | 0 | V | 49  | 0   | 0.01 | 0.09 | 0.31 |
| NKI-AvL 083 | 1 | 0 | V | 160 | 0   | 0.05 | 0.22 | 0.21 |
| NKI-AvL 084 | 1 | 0 | V | 67  | 0   | 0.00 | 0.06 | 0.18 |
| NKI-AvL 085 | 0 | 0 | V | 66  | 60  | 0.00 | 0.00 | 0.05 |
| NKI-AvL 086 | 0 | 0 | V | 49  | 0   | 0.00 | 0.00 | 0.03 |
| NKI-AvL 087 | 1 | 1 | V | 193 | 95  | 0.00 | 0.00 | 0.01 |
| NKI-AvL 088 | 0 | 0 | V | 24  | 40  | 0.00 | 0.00 | 0.00 |
| NKI-AvL 089 | 0 | 0 | V | 11  | 0   | 0.00 | 0.00 | 0.10 |
| NKI-AvL 090 | 1 | 1 | V | 60  | 100 | 0.00 | 0.00 | 0.02 |
| NKI-AvL 091 | 0 | 0 | V | 380 | 1   | 0.13 | 0.33 | 1.33 |
| NKI-AvL 092 | 0 | 0 | V | 2   | 0   | 0.00 | 0.00 | 0.07 |
| NKI-AvL 093 | 1 | 1 | V | 139 | 0   | 0.02 | 0.14 | 0.28 |
| NKI-AvL 094 | 0 | 0 | V | 0   | 0   | 0.00 | 0.00 | 0.02 |
| NKI-AvL 095 | 1 | 1 | T | 459 | 60  | NA   | NA   | NA   |
| NKI-AvL 096 | 1 | 1 | T | 245 | 80  | NA   | NA   | NA   |
| NKI-AvL 097 | 1 | 1 | T | 595 | 0   | NA   | NA   | NA   |
| NKI-AvL 098 | 1 | 0 | T | 13  | 0   | NA   | NA   | NA   |
| NKI-AvL 099 | 0 | 0 | T | 39  | 0   | NA   | NA   | NA   |
| NKI-AvL 100 | 0 | 0 | T | 4   | 0   | NA   | NA   | NA   |
| NKI-AvL 101 | 0 | 0 | T | 85  | 30  | NA   | NA   | NA   |
| NKI-AvL 102 | 0 | 0 | T | 28  | 0   | NA   | NA   | NA   |
| NKI-AvL 103 | 0 | 0 | T | 84  | 0   | NA   | NA   | NA   |
| NKI-AvL 104 | 0 | 0 | T | 83  | 0   | NA   | NA   | NA   |
| NKI-AvL 105 | 0 | 0 | T | 65  | 80  | NA   | NA   | NA   |
| NKI-AvL 106 | 0 | 0 | T | 2   | 0   | NA   | NA   | NA   |
| NKI-AvL 107 | 0 | 0 | T | 57  | 0   | NA   | NA   | NA   |
| NKI-AvL 108 | 0 | 0 | V | 161 | 0   | NA   | NA   | NA   |
| NKI-AvL 109 | 0 | 0 | V | 194 | 0   | NA   | NA   | NA   |
| NKI-AvL 110 | 0 | 0 | V | 42  | 0   | NA   | NA   | NA   |
| NKI-AvL 111 | 0 | 0 | V | 552 | 0   | NA   | NA   | NA   |
| NKI-AvL 112 | 0 | 0 | V | 193 | 3   | NA   | NA   | NA   |
| NKI-AvL 113 | 0 | 0 | V | 7   | 0   | NA   | NA   | NA   |
| NKI-AvL 114 | 1 | 0 | V | 139 | 0   | NA   | NA   | NA   |
| NKI-AvL 115 | 0 | 0 | V | 25  | 0   | NA   | NA   | NA   |
| NKI-AvL 116 | 1 | 0 | V | 12  | 0   | NA   | NA   | NA   |
| NKI-AvL 117 | 1 | 1 | V | 868 | 2   | NA   | NA   | NA   |
| NKI-AvL 118 | 1 | 1 | V | 96  | 40  | NA   | NA   | NA   |
| NKI-AvL 119 | 0 | 0 | V | 66  | 0   | NA   | NA   | NA   |
| NKI-AvL 120 | 0 | 0 | V | 0   | 1   | NA   | NA   | NA   |

**Table S3.** Patient characteristics and treatment outcomes for training and validation set.

|                            |                | Training cohort (n=43) | Validation cohort (n=77) |
|----------------------------|----------------|------------------------|--------------------------|
| Sex                        | <i>p</i> =0.13 |                        |                          |
| Male, no.(%)               |                | 18 (42%)               | 44 (57%)                 |
| Female, no.(%)             |                | 25 (58%)               | 33 (43%)                 |
| Age (years), mean (s.d.)   | <i>p</i> =0.21 | 64 (8)                 | 62 (9)                   |
| Smoking (never/ex/current) | <i>p</i> =0.84 | 3/35/5                 | 8/58/11                  |
| Pack years, median (IQR)   | <i>p</i> =0.62 | 30 (21)                | 28 (28)                  |
| PS, no.(%)                 | <i>p</i> =0.53 |                        |                          |
| 0                          |                | 12 (28%)               | 24 (31%)                 |
| 1                          |                | 22 (51%)               | 43 (56%)                 |
| ≥2                         |                | 9 (21%)                | 10 (13%)                 |
| Pathology, no.(%)          | <i>p</i> =0.90 |                        |                          |
| Adeno                      |                | 26 (60%)               | 50 (65%)                 |
| Squamous                   |                | 9 (21%)                | 12 (16%)                 |
| LCNEC, NSCLC-type          |                | 1 (2%)                 | 2 (2%)                   |
| NSCLC, NOS                 |                | 7 (16%)                | 13 (17%)                 |
| Mutations, no. (%)         | <i>p</i> =0.18 |                        |                          |
| KRAS positive              |                | 22 (51%)               | 29 (38%)                 |
| PD-L1 TPS, no. (%)         |                |                        |                          |
| Negative <1%               | <i>p</i> =0.17 | 22 (51%)               | 50 (65%)                 |
| Positive ≥1%               |                | 21 (49%)               | 27 (35%)                 |
| Negative <50%              | <i>p</i> =0.39 | 36 (84%)               | 69 (90%)                 |
| Positive ≥50%              |                | 7 (16%)                | 8 (10%)                  |
| Brain metastases, no. (%)  | <i>p</i> =1.00 | 7 (16%)                | 14 (18%)                 |
| Treatment, no. (%)         | <i>p</i> =0.11 |                        |                          |
| Nivolumab                  |                | 30 (70%)               | 64 (83%)                 |
| Pembrolizumab              |                | 13 (30%)               | 13 (17%)                 |
| Line of treatment, no (%)  | <i>p</i> =0.19 |                        |                          |
| 1                          |                | 0 (0%)                 | 1 (1%)                   |
| 2                          |                | 35 (81%)               | 52 (68%)                 |
| >2                         |                | 8 (19%)                | 24 (31%)                 |
| Best Overall Response      | <i>p</i> =0.47 |                        |                          |
| CR/PR                      |                | 12 (28%)               | 12 (16%)                 |
| SD (PFS ≥6 months)         |                | 2 (5%)                 | 11 (14%)                 |
| SD (PFS <6 months)         |                | 2 (5%)                 | 4 (5%)                   |
| PD                         |                | 27 (63%)               | 50 (65%)                 |
| DC                         |                |                        |                          |
| 6 months                   | <i>p</i> =0.68 | 33% (14/43)            | 29% (22/77)              |
| 12 months                  | <i>p</i> =0.25 | 28% (12/43)            | 18% (14/77)              |

*s.d.*, standard deviation; *IQR*, interquartile range; *PS*, Performance Score, based on the European Cooperative Oncology group (ECOG) performance status score. This is a score ranging from 0 to 5, where 0 indicates no symptoms, 1 indicates mild symptoms and above 1 indicates greater disability; *LCNEC NSCLC type*, large cell neuroendocrine carcinoma non-small cell lung cancer type; *NOS*, not otherwise specified; *KRAS*, Kirsten Rat Sarcoma viral oncogene; *PD-L1*, programmed death ligand 1; *TPS*, tumor proportion score; *CR*, complete response; *PR*, partial response; *SD*, stable disease; *PD*, progressive disease; *DC*, disease control.

**Table S4.** Tissue sample properties of the training and validation set.

|                              |                | Training cohort (n=43) | Validation cohort (n=77) |
|------------------------------|----------------|------------------------|--------------------------|
| Sample type                  | <i>p</i> =0.33 |                        |                          |
| Biopsy                       |                | 30 (70%)               | 58 (75%)                 |
| Resection                    |                | 13 (30%)               | 19 (25%)                 |
|                              |                |                        |                          |
| Sample site                  | <i>p</i> =0.46 |                        |                          |
| Primary                      |                | 19 (44%)               | 32 (41%)                 |
| Metastasis                   |                | 16 (37%)               | 36 (47%)                 |
| <i>Lung</i>                  |                | 1                      | 5                        |
| <i>Adrenal gland</i>         |                | 3                      | 7                        |
| <i>Bone</i>                  |                | 0                      | 7                        |
| <i>Pleurae</i>               |                | 0                      | 1                        |
| <i>Brain</i>                 |                | 0                      | 2                        |
| <i>Muscle / Subcutaneous</i> |                | 3                      | 8                        |
| <i>Liver</i>                 |                | 6                      | 3                        |
| <i>Mamma</i>                 |                | 2                      | 1                        |
| <i>Gastrointestinal</i>      |                | 1                      | 2                        |
| Lymph node metastasis        |                | 8 (19%)                | 9 (12%)                  |

**Table S5.** The relationship between PD-1<sup>T</sup> and clinicopathological variables as categories.

|                            |                 | PD1 <sup>T</sup> <90 per mm <sup>2</sup> | PD1 ≥90 per mm <sup>2</sup> |
|----------------------------|-----------------|------------------------------------------|-----------------------------|
|                            |                 | n=69                                     | n=51                        |
| Sex                        | <i>p</i> =0.58  |                                          |                             |
| Male, no.(%)               |                 | 34 (49%)                                 | 28 (55%)                    |
| Female, no.(%)             |                 | 35 (51%)                                 | 23 (45%)                    |
|                            |                 |                                          |                             |
| Age (years), median (IQR)  | <i>p</i> = 0.96 | 63 (57 - 70)                             | 64 (58 - 68)                |
|                            |                 |                                          |                             |
| Smoking (never/ex/current) | <i>p</i> = 0.47 | 8/52/9                                   | 3/41/7                      |
| Pack years, median (IQR)   | <i>p</i> = 0.18 | 25 (13 - 40)                             | 30 (20 - 40)                |
|                            |                 |                                          |                             |
| PS, no. (%)                | <i>p</i> =0.11  |                                          |                             |
| 0                          |                 | 18 (26%)                                 | 18 (35%)                    |
| 1                          |                 | 37 (54%)                                 | 28 (55%)                    |
| ≥2                         |                 | 14 (20%)                                 | 5 (10%)                     |
|                            |                 |                                          |                             |
| Pathology, no.(%)          | <i>p</i> =0.20  |                                          |                             |
| Adeno                      |                 | 48 (69%)                                 | 28 (55%)                    |
| Squamous                   |                 | 8 (12%)                                  | 13 (25%)                    |
| LCNEC, NSCLC-type          |                 | 2 (3%)                                   | 1 (2%)                      |
| NSCLC, NOS                 |                 | 11 (16%)                                 | 9 (18%)                     |
|                            |                 |                                          |                             |
| Mutations, no. (%)         | <i>p</i> =1     |                                          |                             |
| KRAS positive              |                 | 31 (45%)                                 | 20 (39%)                    |
| KRAS negative              |                 | 26 (38%)                                 | 17 (33%)                    |
| Kras unknown               |                 | 12 (17%)                                 | 14 (28%)                    |
|                            |                 |                                          |                             |
| Brain metastases, no. (%)  | <i>p</i> =0.22  | 15 (22%)                                 | 6 (12%)                     |
|                            |                 |                                          |                             |
| Treatment, no. (%)         | <i>p</i> =0.66  |                                          |                             |
| Nivolumab                  |                 | 53 (77%)                                 | 41 (80%)                    |
| Pembrolizumab              |                 | 16 (23%)                                 | 10 (20%)                    |
|                            |                 |                                          |                             |
| Line of treatment, no (%)  | <i>p</i> =0.21  |                                          |                             |
| 1                          |                 | 1 (1%)                                   | 0 (0%)                      |
| 2                          |                 | 53 (77%)                                 | 34 (67%)                    |
| >2                         |                 | 15 (22%)                                 | 17 (%)                      |

**Table S6.** The relationship between PD-1<sup>T</sup> and clinicopathological variables as continuous variable.

|                         |                 | PD1 <sup>T</sup> TILs per mm <sup>2</sup> (quantiles) |     |     |     |      |
|-------------------------|-----------------|-------------------------------------------------------|-----|-----|-----|------|
|                         |                 | 0%                                                    | 25% | 50% | 75% | 100% |
| Sex                     | <i>p</i> =0.67  |                                                       |     |     |     |      |
| Male (n=62)             |                 | 0                                                     | 25  | 67  | 201 | 1875 |
| Female (n=58)           |                 | 1                                                     | 26  | 69  | 199 | 868  |
| Smoking                 | <i>p</i> = 0.86 |                                                       |     |     |     |      |
| Never (n=11)            |                 | 6                                                     | 30  | 67  | 145 | 459  |
| Ex (n=93)               |                 | 0                                                     | 24  | 66  | 194 | 1875 |
| Current (n=16)          |                 | 7                                                     | 40  | 82  | 207 | 457  |
| PS                      | <i>p</i> =0.19  |                                                       |     |     |     |      |
| 0 (n=36)                |                 | 2                                                     | 25  | 85  | 238 | 868  |
| 1 (n=65)                |                 | 0                                                     | 27  | 80  | 181 | 1875 |
| ≥2 (n=19)               |                 | 0                                                     | 26  | 66  | 118 | 457  |
| Pathology               | <i>p</i> = 0.60 |                                                       |     |     |     |      |
| Adeno (n=76)            |                 | 0                                                     | 25  | 63  | 184 | 1875 |
| Squamous (n=21)         |                 | 2                                                     | 31  | 139 | 213 | 595  |
| LCNEC, NSCLC-type (n=3) |                 | 0                                                     | 21  | 82  | 264 | 552  |
| NSCLC, NOS (n=20)       |                 | 7                                                     | 37  | 67  | 97  | 126  |
| Mutations               | <i>p</i> = 0.42 |                                                       |     |     |     |      |
| KRAS positive (n=51)    |                 | 0                                                     | 30  | 80  | 200 | 1875 |
| KRAS negative (n=43)    |                 | 2                                                     | 20  | 66  | 212 | 595  |
| Kras unknown (n=26)     |                 | 0                                                     | 26  | 101 | 185 | 298  |
| Brain metastases        | <i>p</i> = 0.38 |                                                       |     |     |     |      |
| Yes (n=21)              |                 | 0                                                     | 29  | 60  | 152 | 828  |
| No (n=99)               |                 | 0                                                     | 25  | 80  | 207 | 1875 |
| Treatment               | <i>p</i> = 0.81 |                                                       |     |     |     |      |
| Nivolumab (n=94)        |                 | 0                                                     | 25  | 68  | 206 | 1875 |
| Pembrolizumab (n=26)    |                 | 0                                                     | 26  | 75  | 185 | 868  |
| Line of treatment       | <i>p</i> = 0.13 |                                                       |     |     |     |      |
| 1 (n=1)                 |                 |                                                       |     |     |     |      |
| 2 (n=87)                |                 | 0                                                     | 25  | 66  | 187 | 868  |
| >2 (n=32)               |                 | 0                                                     | 26  | 104 | 258 | 1875 |

**Table S7.** Predictive accuracy of PD-L1 TPS at 1%, 5%, 10% and 50% cut-off in the validation set (n=77).

| Clinical outcome | Biomarker   | AUC                              | Cut-off      | Sensitivity | Specificity | NPV | PPV |
|------------------|-------------|----------------------------------|--------------|-------------|-------------|-----|-----|
| DC 6m            | % PD-L1 TPS | 0.58<br><i>95% CI: 0.43-0.74</i> | <1% vs ≥1%   | 41%         | 67%         | 74% | 33% |
|                  |             |                                  | <5% vs ≥5%   | 36%         | 82%         | 76% | 44% |
|                  |             |                                  | <10% vs ≥10% | 32%         | 82%         | 75% | 41% |
|                  |             |                                  | <50% vs ≥50% | 23%         | 95%         | 75% | 63% |
| DC 12m           | % PD-L1 TPS | 0.68<br><i>95% CI: 0.51-0.86</i> | <1% vs ≥1%   | 57%         | 70%         | 88% | 30% |
|                  |             |                                  | <5% vs ≥5%   | 50%         | 83%         | 88% | 39% |
|                  |             |                                  | <10% vs ≥10% | 43%         | 83%         | 87% | 35% |
|                  |             |                                  | <50% vs ≥50% | 29%         | 94%         | 86% | 50% |

**Table S8.** Predictive accuracy of composite biomarkers PD-L1 TPS+PD-L1 IC in all nivolumab treated patients (n=94).

| Clinical outcome | Biomarker              | Cut-off                                    | Sensitivity | Specificity | NPV | PPV |
|------------------|------------------------|--------------------------------------------|-------------|-------------|-----|-----|
| DC 6 months      | % PD-L1 TPS + PD-L1 IC | <50%+<2 VS ≥50%+<2 and <50%+≥2 and ≥50%+≥2 | 82          | 44          | 85  | 38  |
| DC 6 months      | % PD-L1 TPS + PD-L1 IC | <1%+<2 VS ≥1%+<2 and <1%+≥2 and ≥1%+≥2     | 82          | 53          | 88  | 43  |
| DC 12 months     | % PD-L1 TPS + PD-L1 IC | <50%+<2 VS ≥50%+<2 and <50%+≥2 and ≥50%+≥2 | 90          | 44          | 94  | 32  |
| DC 12 months     | % PD-L1 TPS + PD-L1 IC | <1%+<2 VS ≥1%+<2 and <1%+≥2 and ≥1%+≥2     | 90          | 52          | 95  | 35  |

**Table S9.** Predictive accuracy of composite biomarkers PD-1<sup>T</sup> TILs+PD-L1.

| Clinical outcome | Biomarker                                                | Cut-off                                        | Sensitivity | Specificity | NPV  | PPV |
|------------------|----------------------------------------------------------|------------------------------------------------|-------------|-------------|------|-----|
| DC 6 months      | PD-1 <sup>T</sup> TILs per mm <sup>2</sup> + % PD-L1 TPS | <90+<50% VS ≥90+<50% and <90+≥50% and ≥90+≥50% | 86%         | 64%         | 92%  | 49% |
| DC 6 months      | PD-1 <sup>T</sup> TILs per mm <sup>2</sup> + % PD-L1 TPS | <90+<1% VS ≥90+<1% and <90+≥1% and ≥90+≥1%     | 86%         | 49%         | 90%  | 40% |
| DC 12 months     | PD-1 <sup>T</sup> TILs per mm <sup>2</sup> + % PD-L1 TPS | <90+<50% VS ≥90+<50% and <90+≥50% and ≥90+≥50% | 100%        | 60%         | 100% | 36% |
| DC 12 months     | PD-1 <sup>T</sup> TILs per mm <sup>2</sup> + % PD-L1 TPS | <90+<1% VS ≥90+<1% and <90+≥1% and ≥90+≥1%     | 100%        | 48%         | 100% | 30% |
